# Supplementary material for: Antimicrobial susceptibility profile of Neisseria gonorrhoeae from patients attending a medical laboratory, Institut Pasteur de Madagascar between 2014 and 2020: phenotypical and genomic characterisation in a subset of Neisseria gonorrhoeae isolates
Source: PubMed Central journal article supplement — Sex Transm Infect. 2023 Nov 9;100(1):25–30. doi: 10.1136/sextrans-2023-055878 (PMC10850657; doi:10.1136/sextrans-2023-055878), 2023-11-09
Supplement: sextrans-2023-055878supp002.pdf [file sextrans-2023-055878supp002.pdf]

## Objectifs

La résistance aux antimicrobiens des *Neisseria gonorrhoeae* est préoccupante. Très peu sont les informations sur les profils de sensibilité aux antimicrobiens et les mécanismes de résistance génétique associés chez les NG à Madagascar. Nous rapportons les données de sensibilité des isolats de NG obtenus par le laboratoire médical (CBC) de l'Institut Pasteur de Madagascar, Antananarivo, Madagascar, au cours de la période 2014-2020. Nous présentons les données sur les mécanismes de résistance aux antimicrobiens et les profils phénotypiques d'un sous-ensemble de ces isolats.

## Méthodes

Nous avons récupéré les données rétrospectives (N = 395) de patients associés aux NG isolés entre 2014 et 2020 par le CBC. Nous avons retesté 46 isolats viables, dont six décrits résistants à la ceftriaxone et deux à l'azithromycine, ainsi que 33 isolés en 2020. Nous avons déterminé les concentrations minimales inhibitrices pour la ceftriaxone, la ciprofloxacine, l'azithromycine, la pénicilline, la tétracycline et la spectinomycine par la méthode E-test. Nous avons obtenu des séquences du génome entier et identifié les déterminants génétiques associés à la résistance aux antimicrobiens et les séquences types (ST).

## Résultats

Sur la période d'étude, les isolats résistants à la ceftriaxone ont dépassé le seuil de 5 % en 2017 (7,4 % (4/ sur 54)) et en 2020 (7,1 % (3/ sur 42)). Tous les isolats retestés se sont révélés sensibles à la ceftriaxone, à l'azithromycine et à la spectinomycine, et résistants à la ciprofloxacine. La majorité étaient résistantes à la pénicilline (83 % (38/sur 46)) et à la tétracycline (87 % (40/sur 46)). Nous avons détecté des mutations chromosomiques associées à la résistance aux antibiotiques dans les gènes *gyrA*, *parC*, *penA*, *ponA*, *porB* et *mtrR*. Aucun des isolats retestés ne portait le gène mosaïque *penA*. Le taux élevé de résistance à la pénicilline et à la tétracycline s'explique par la présence du gène *bla<sub>TEM</sub>* (94,7% (36/ sur 38)) et de *tetM* (97,5% (39/ sur 40)). Nous avons trouvé un nombre élevé de MLST-ST circulants. Près de la moitié d'entre eux étaient de nouveaux types, et un nouveau ST figurait parmi les quatre plus prédominants.

## Conclusion

Notre rapport fournit un ensemble de données détaillées, obtenues grâce à des méthodes phénotypiques et génotypiques, qui serviront de base pour la surveillance future de la NG. Nous n'avons pas pu confirmer la présence d'isolats résistants à la ceftriaxone. Nos résultats soulignent l'importance de mettre en œuvre une surveillance avec une assurance qualité de la résistance aux antimicrobiens des gonocoques à Madagascar.
